# Supplementary material
Source: ML conference proceedings conference paper supplement (https://openreview.net/forum?id=hmvCXDzPUR)
Supplement: supplementary_material [file attachment]

# Reward models

Images → Aesthetic score  
Molecules → QED  
DNAs → Cell-specificity

Images → Aesthetic score  
Molecules → QED  
DNAs → Cell-specificity

Images → Aesthetic score  
Molecules → QED  
DNAs → Cell-specificity

## Pre-trained diffusion models

RL↓

RL ↓

**RL↓**

## Fine-tuned diffusion models

## Images

## Molecules

## DNA<sub>s</sub>

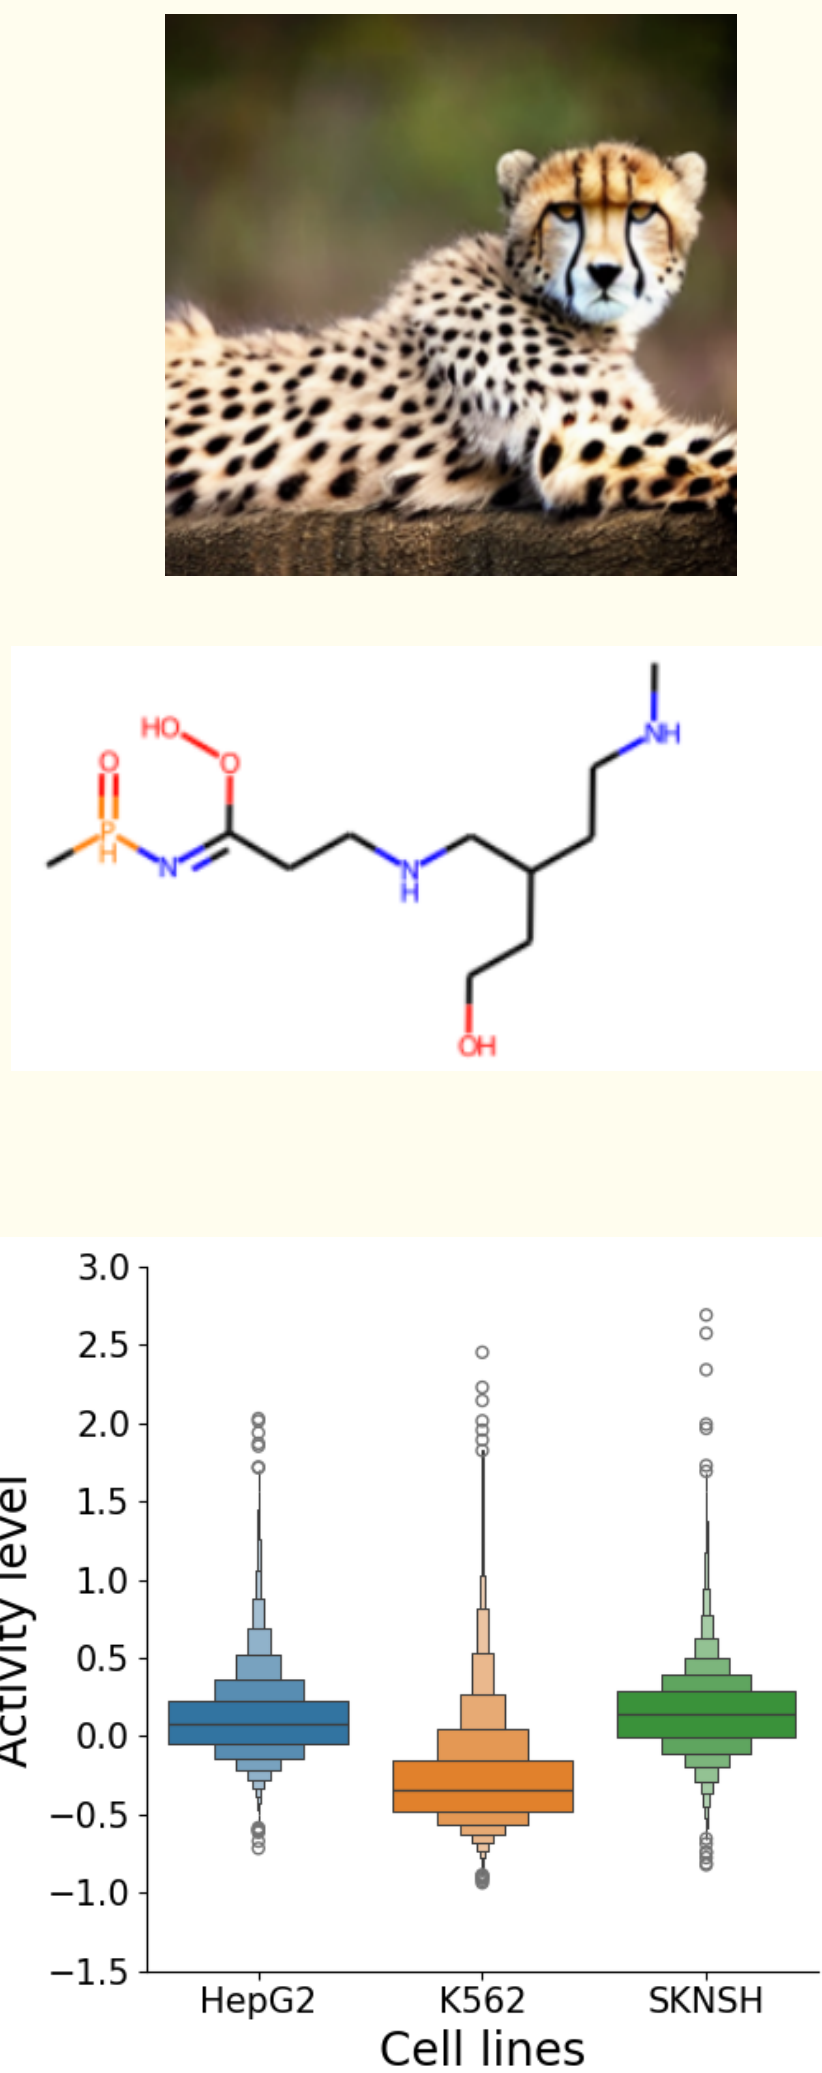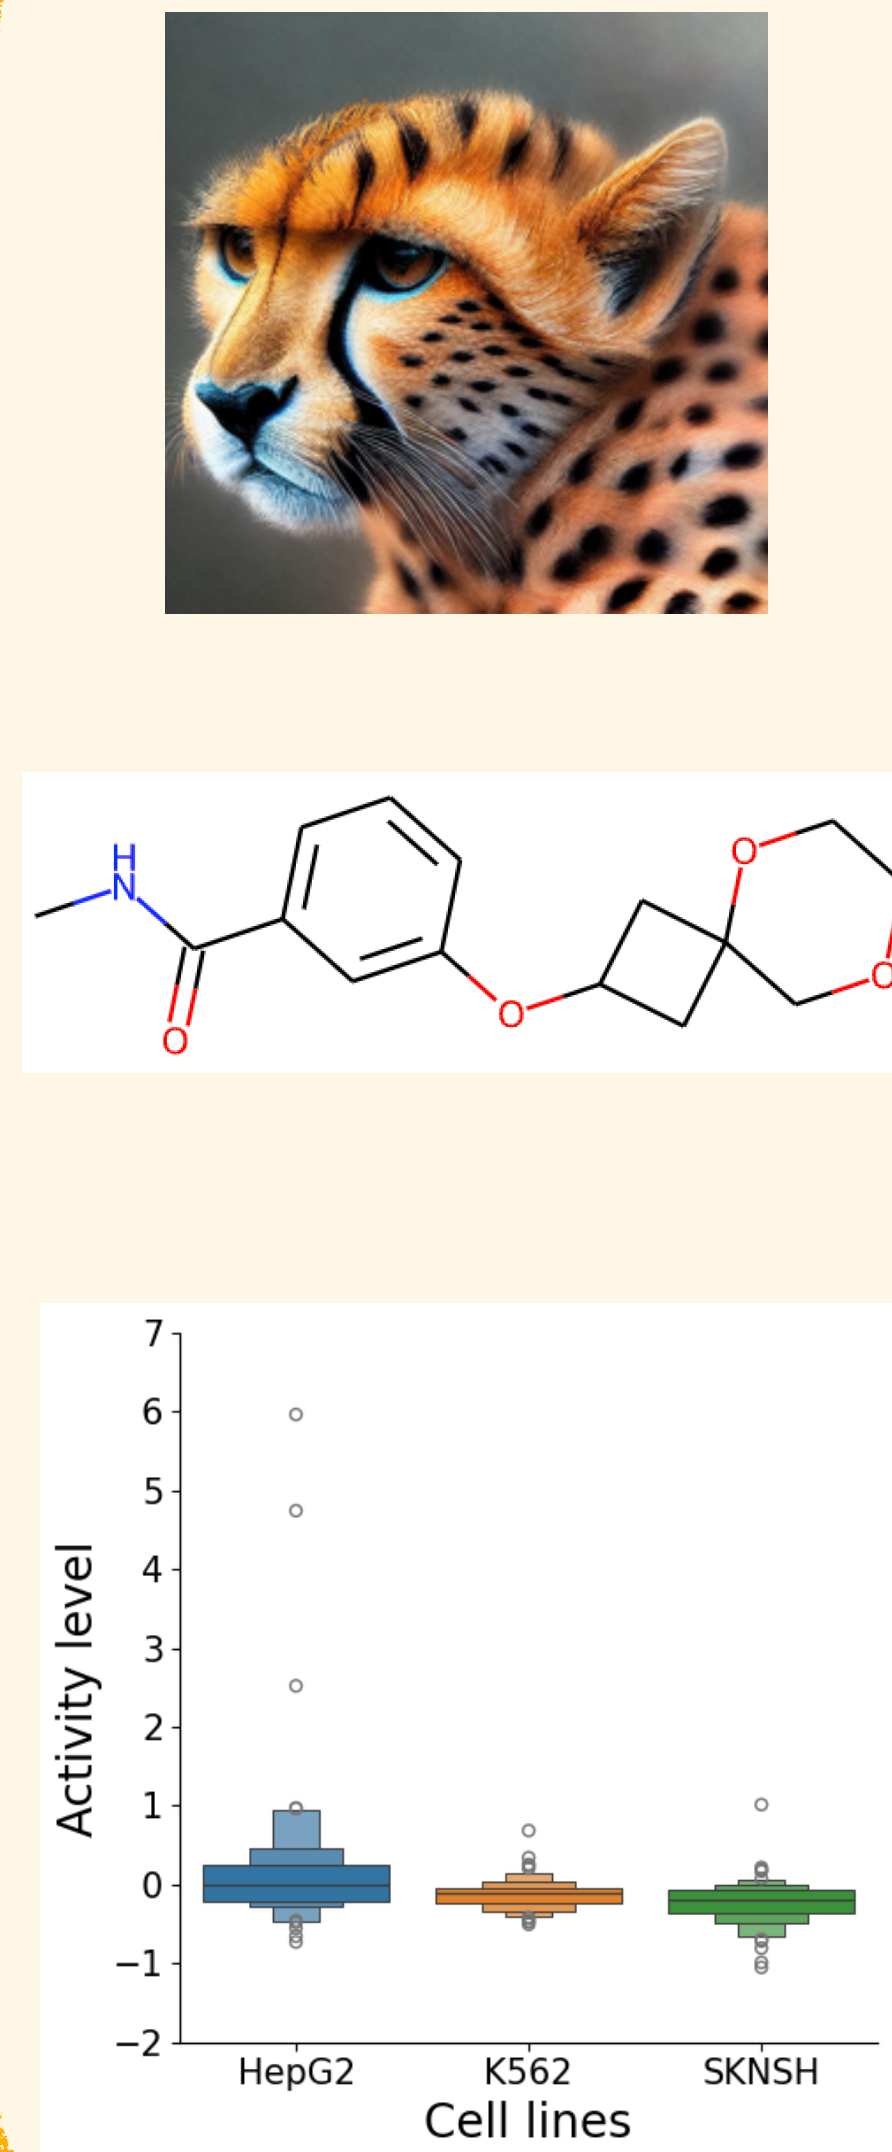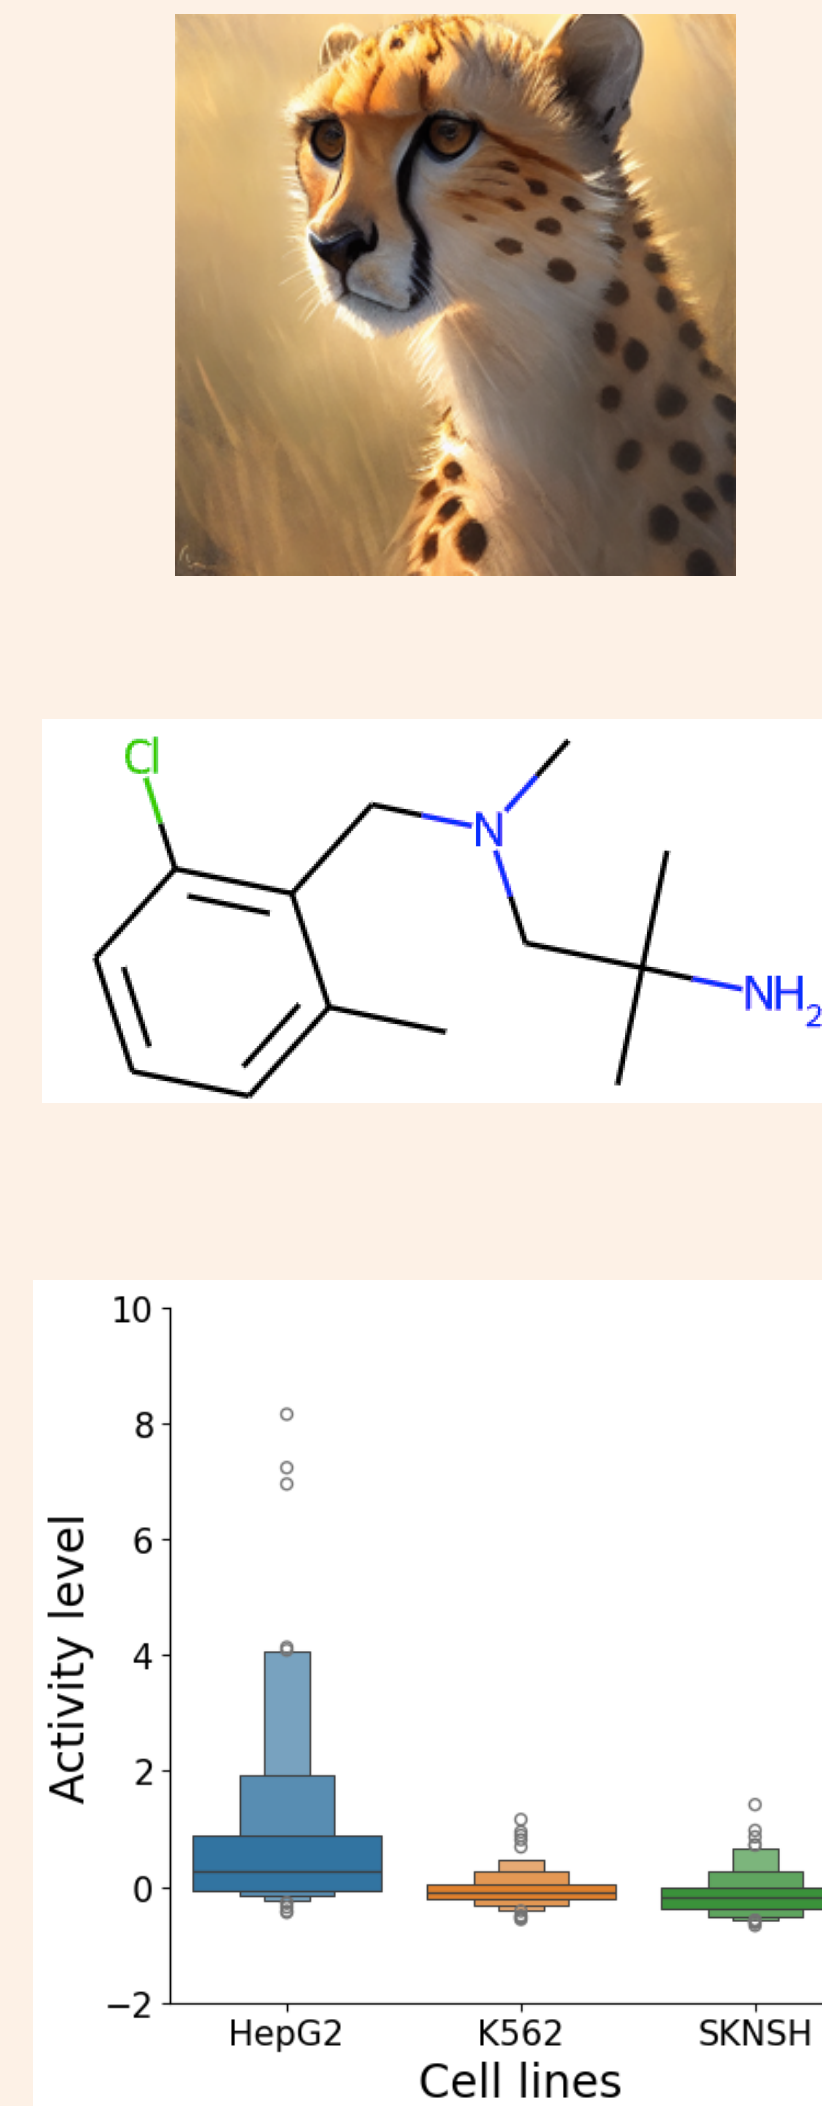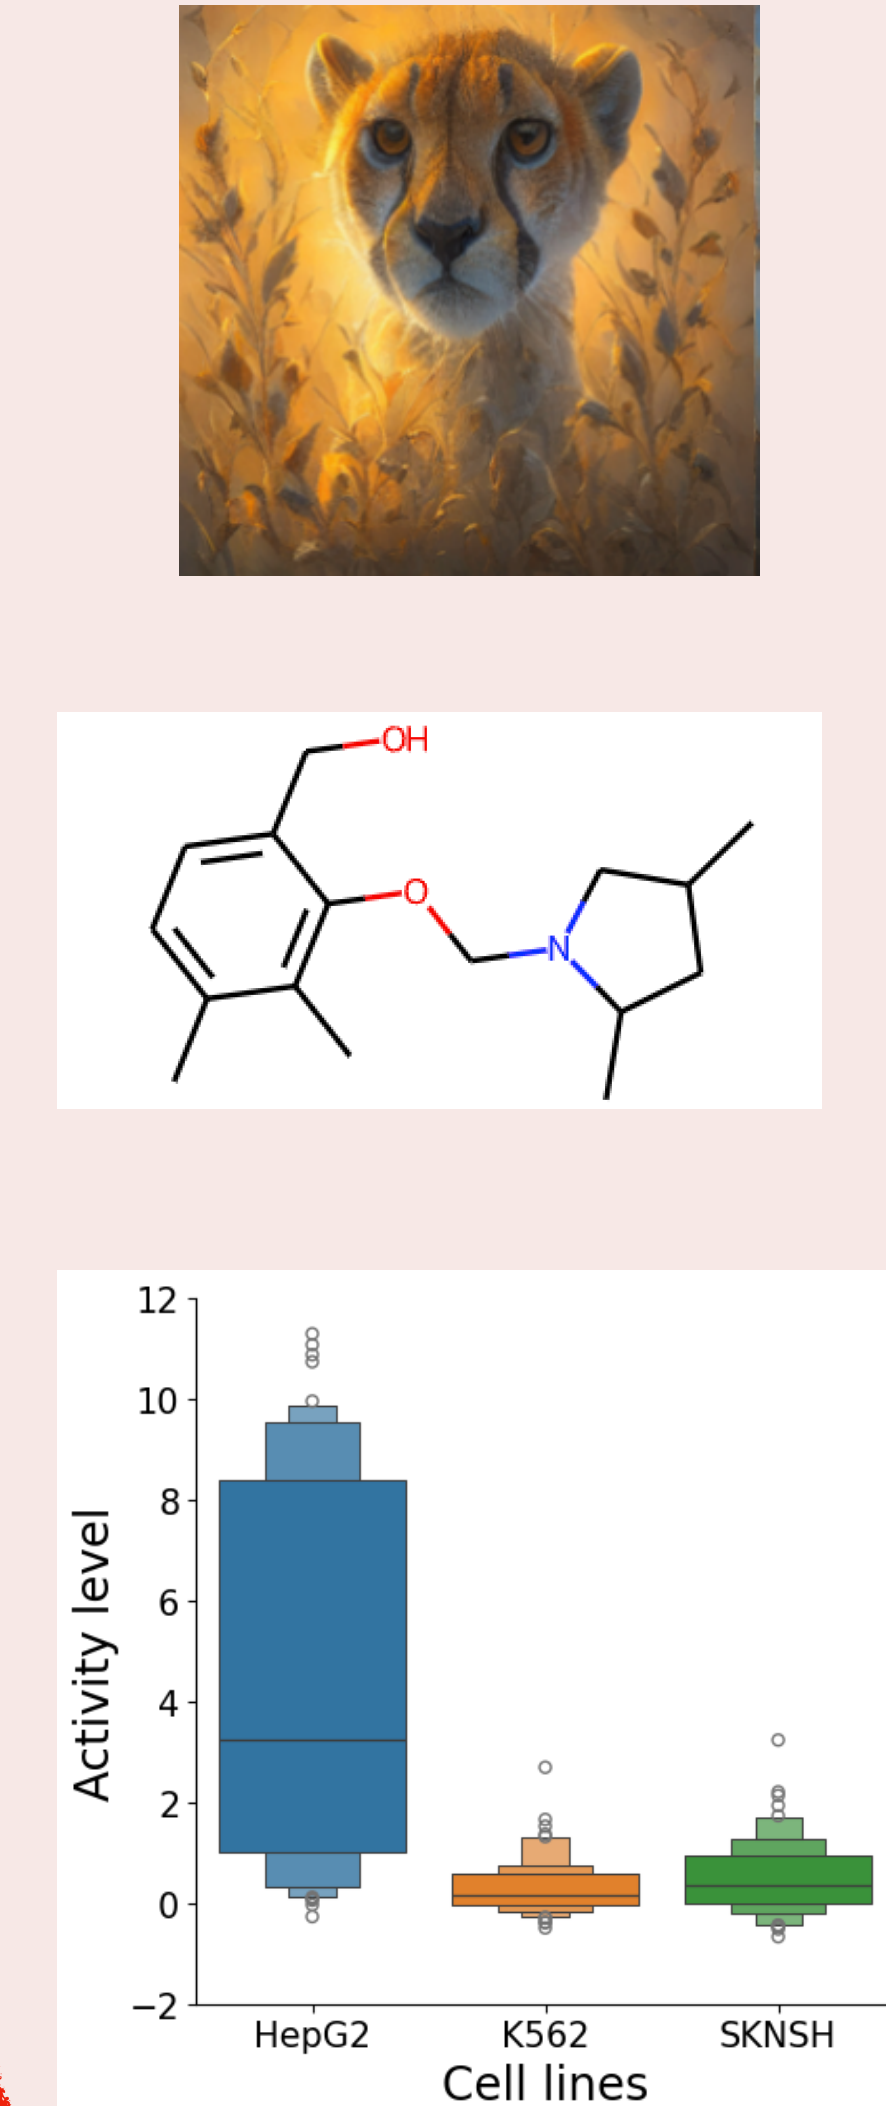

## Images with **high aesthetic score**

## Molecules with high QED

## DNAs with **high cell-specificity**
